# Supplementary material for: Profiling Cellular Processes in Adipose Tissue during Weight Loss Using Time Series Gene Expression
Source: PubMed Central journal article supplement (PMC6266822; doi:10.3390/genes9110525), 2018-10-29
Supplement: genes-09-00525-s001.pdf [file genes-09-00525-s001.pdf]

# Profiling cellular processes in adipose tissue during weight loss using time series gene expression

Samar H.K. Tareen<sup>1,\*</sup>, Michiel E. Adriaens<sup>1</sup>, Ilja C.W. Arts<sup>1,2</sup>, Theo M. de Kok<sup>1,3</sup>, Roel G. Vink<sup>4</sup>, Nadia J.T. Roumans<sup>4</sup>, Marleen A. van Baak<sup>4</sup>, Edwin C.M. Mariman<sup>4</sup>, Chris T. Evelo<sup>1,5</sup>, and Martina Kutmon<sup>1,5</sup>

<sup>1</sup>Maastricht Centre for Systems Biology (MaCSBio), Maastricht University, Maastricht, the Netherlands

<sup>2</sup>Department of Epidemiology, CARIM School for Cardiovascular Diseases, Maastricht University, Maastricht, the Netherlands

<sup>3</sup>Department of Toxicogenomics, GROW School of Oncology and Developmental Biology, Maastricht University, Maastricht, the Netherlands

<sup>4</sup>Department of Human Biology, NUTRIM Research School, Maastricht University, Maastricht, the Netherlands

<sup>5</sup>Department of Bioinformatics - BiGCaT, NUTRIM Research School, Maastricht University, Maastricht, the Netherlands

[\\*samar.tareen@maastrichtuniversity.nl](mailto:samar.tareen@maastrichtuniversity.nl)

## Supplementary Information

|                                                                                                                                                                                                                                                    |          |
|----------------------------------------------------------------------------------------------------------------------------------------------------------------------------------------------------------------------------------------------------|----------|
| <b>Figures</b>                                                                                                                                                                                                                                     | <b>2</b> |
| Figure S1: Principal component analysis of the raw gene expression data of the 46 individuals, showing the outlying samples highlighted in red circles.                                                                                            | 2        |
| Figure S2: Correlation network generated for the low calorie diet (LCD).                                                                                                                                                                           | 3        |
| Figure S3: Correlation network generated for the very low calorie diet (VLCD).                                                                                                                                                                     | 3        |
| Figure S4: Frobenius norm plot showing the norm distance of the correlation network of the 44 individuals with the respective diet-wide correlation network.                                                                                       | 4        |
| Figure S5: Gene expression patterns of the respective genes in each topological cluster of the overlap network, based on the fold change in the respective diets. Also shows the five un-clustered paired correlated genes.                        | 5        |
| <b>Source Code</b>                                                                                                                                                                                                                                 | <b>5</b> |
| <b>Tables</b>                                                                                                                                                                                                                                      | <b>7</b> |
| Table S1: Results from the robustness analysis using the minimum %age individuals having the same correlation direction (for $ \text{corr.}  \geq 0.6$ ).                                                                                          | 7        |
| Table S2: Results from the leave-n-out cross-validation analysis for n= 1 and 2 (max 10% of total samples). The correlation criteria is $ \text{corr.}  \geq 0.6$ in at least 25% of the individuals having the same direction of the correlation. | 8        |
| Table S3: Results from the ConsensusPathDB analysis on the overlap network. BioCarta leptin pathway discussed in the discussion section of the article is highlighted in red.                                                                      | 8        |
| Table S4: List of genes in the respective clusters from the overlap network, represented here in HGNC symbols.                                                                                                                                     | 12       |

# Figures

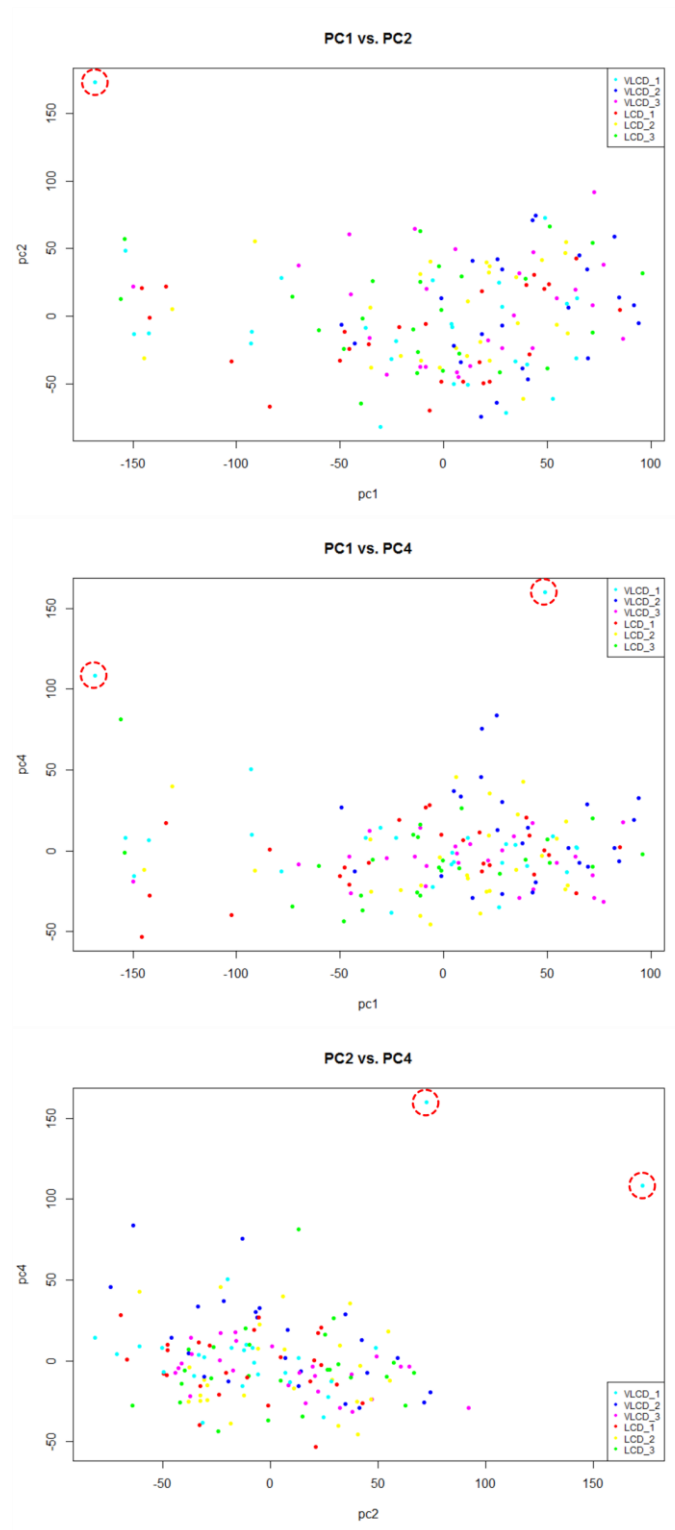

Figure S1: Principal component analysis of the raw gene expression data of the 46 individuals, showing the outlying samples highlighted in red circles.

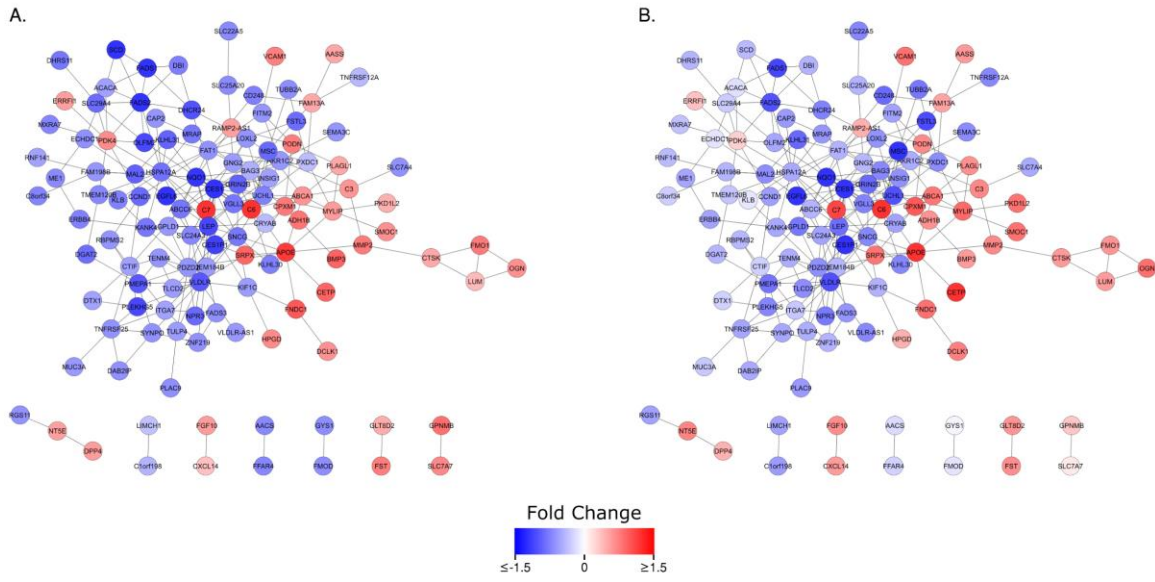

Figure S2: Correlation network generated for the low-calorie diet (LCD).

- A) Fold change for time points 2-1
- B) Fold change for time points 3-1

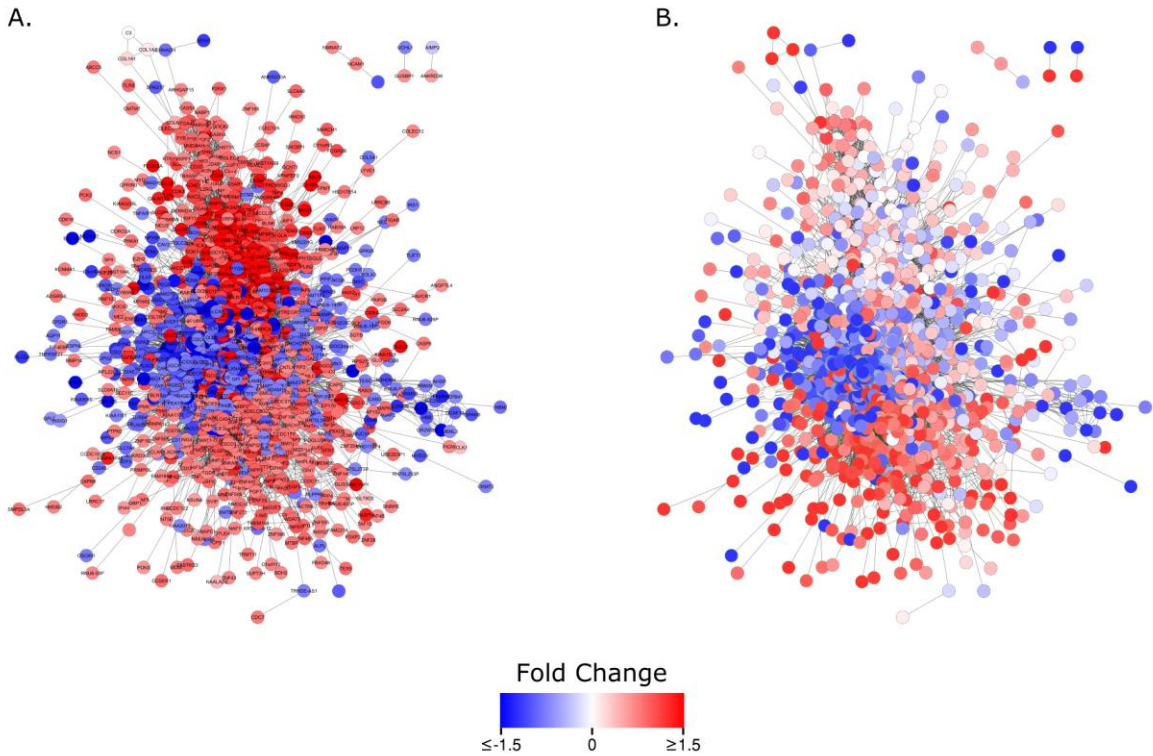

Figure S3: Correlation network generated for the very low-calorie diet (VLCD).

- A) Fold change for time points 2-1
- B) Fold change for time points 3-1

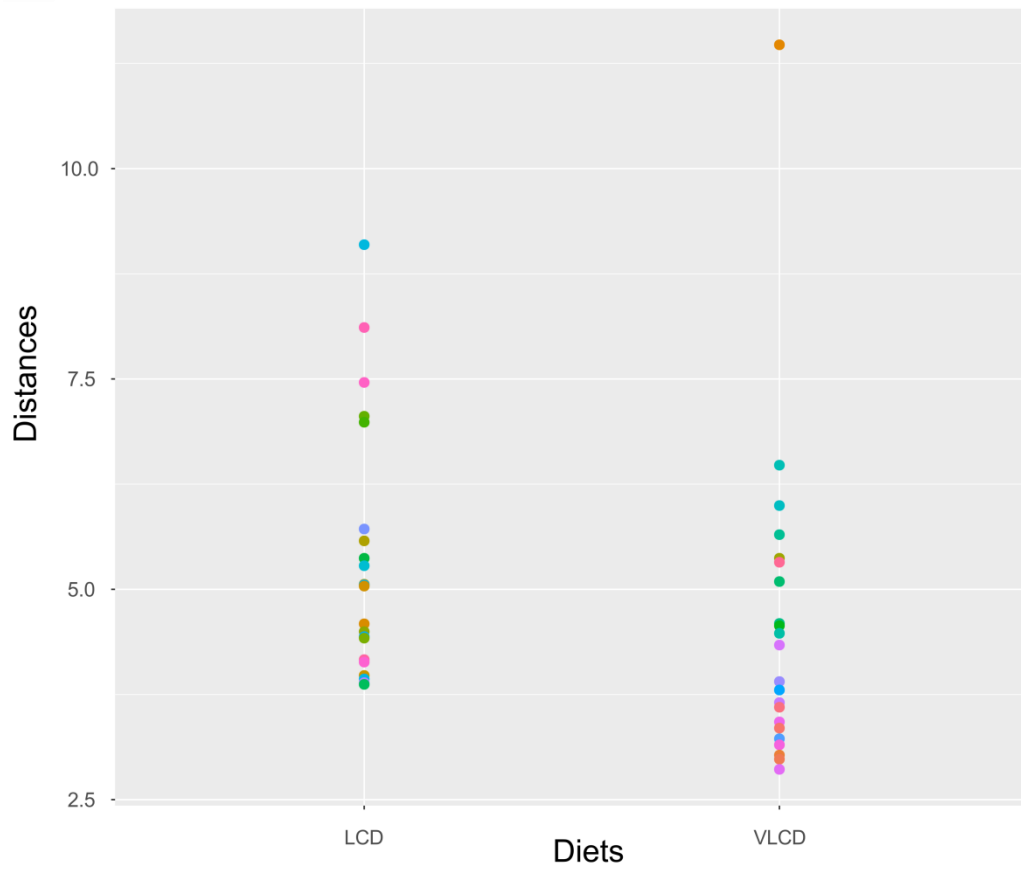

Figure S4: Frobenius norm plot showing the norm distance of the correlation network of the 44 individuals with the respective diet-wide correlation network.

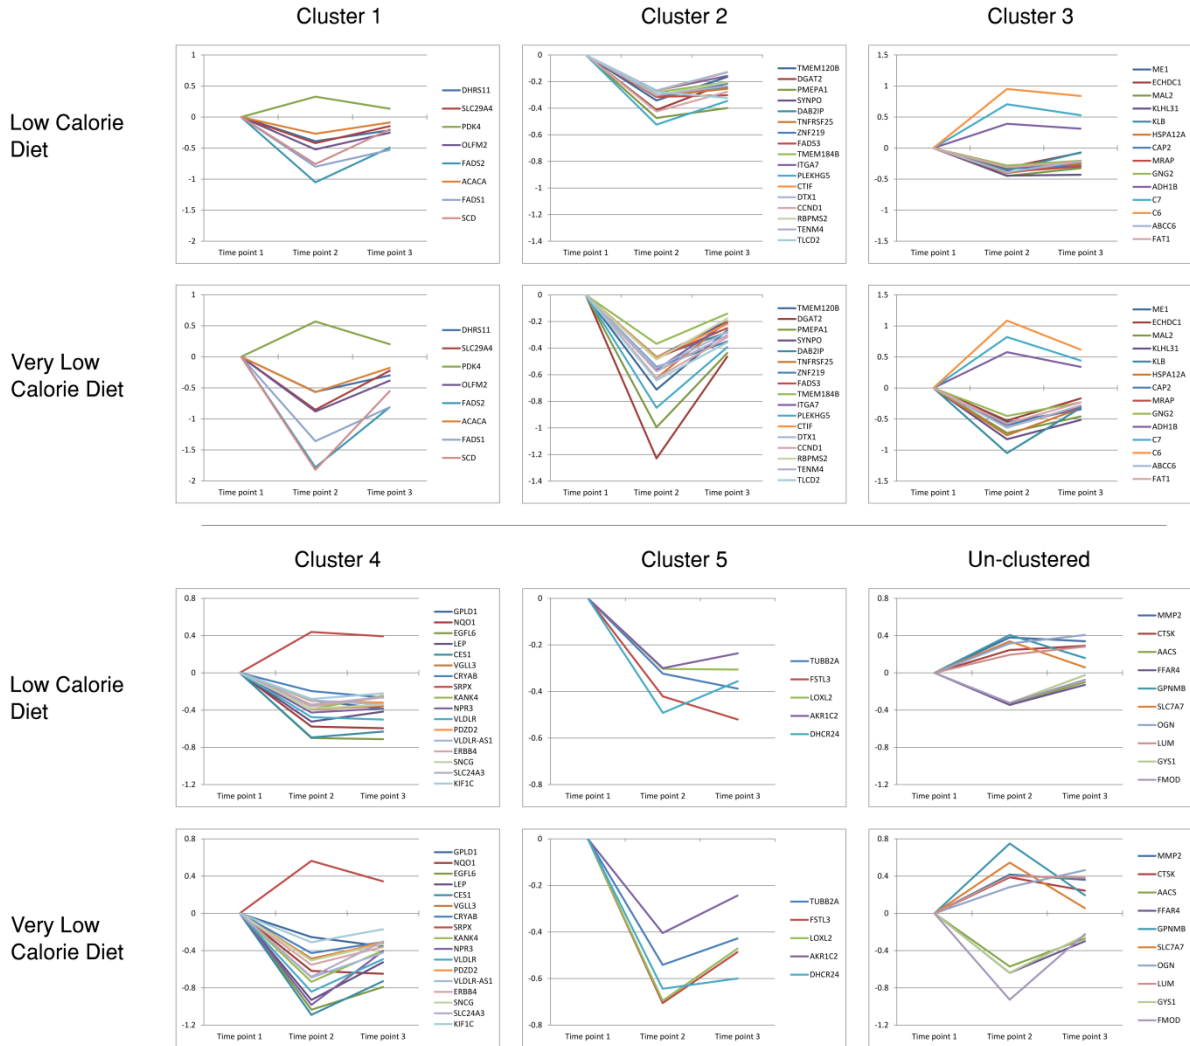

Figure S5: Gene expression patterns of the respective genes in each topological cluster of the overlap network, based on the fold change in the respective diets. Also shows the five un-clustered paired correlated genes.

## Source Code

```
#####
###
#Modified DCEn algorithm for the creation of correlation networks.
#
#Credit for creating the original algorithm goes to:
#    Elo LL, Schwikowski B (2013) Analysis of Time-Resolved Gene Expression
#    Measurements across Individuals. PLoS ONE 8(12): e82340.
#    doi:10.1371/journal.pone.0082340
#
#Modified by Samar Tareen for use with single group/stimulus data over multiple
#    individuals
#Submitted with Manuscript ID: as Appendix material
#
#For complete details of each section of the algorithm, we refer to the original
#    publication
#
```

```

###

#Function name 'tsCorr' (time series correlation); Takes
# 1. dataframe as input data
# 2. filter.corr=0.7 as default minimum correlation cutoff for 1-filter.corr in
positive and -(1-filter.corr) in negative correlations
# 3. filter.n=0.25 as minimum percentage of individuals in which the
correlations should hold

tsCorr <- function(data, filter.corr=0.7, filter.n=0.25) {

  ## Count significant correlations and determine prefiltering for positive
  correlations
  posFilt<- matrix(nrow=nrow(data[[1]]), ncol=nrow(data[[1]]))
  posFilt[]<- 0
  negFilt<- matrix(nrow=nrow(data[[1]]), ncol=nrow(data[[1]]))
  negFilt[]<- 0
  avgCorr<- matrix(nrow=nrow(data[[1]]), ncol=nrow(data[[1]]))
  avgCorr[]<- 0

  for(i in 1:length(data)) {
    C1<- cor(t(data[[i]]))
    C1<- C1 * sqrt(ncol(data[[i]])-2) / sqrt(1 - C1*C1)
    C1<- (1 - 2 * pt(-abs(C1), ncol(data[[i]])-2, lower.tail = TRUE, log.p =
FALSE))*sign(C1)

    avgCorr<- avgCorr + C1

    posTemp <- C1
    posTemp[posTemp > 1-filter.corr]<- 1
    posTemp[posTemp <= 1-filter.corr]<- 0
    diag(posTemp)<- 0
    posFilt<- posFilt + posTemp
    rm(posTemp)

    negTemp <- C1
    negTemp[negTemp < -(1-filter.corr)]<- -1
    negTemp[negTemp >= -(1-filter.corr)]<- 0
    diag(negTemp)<- 0
    negFilt<- negFilt + negTemp
    rm(negTemp)
  }
  rm(C1)
  gc()

  cutoff1<- ceiling(filter.n*length(data))
  posFilt[posFilt<cutoff1]<- 0
  A.pos<- pmax(posFilt)
  A.pos[A.pos>0]<- 1
  rm(posFilt)
  gc()

  negFilt<- abs(negFilt)
  cutoff1<- ceiling(filter.n*length(data))
  negFilt[negFilt<cutoff1]<- 0
  A.neg<- pmax(negFilt)
  A.neg[A.neg>0]<- 1
  rm(negFilt)
  gc()

  avgCorr<- avgCorr/length(data)

```

```

C1<- avgCorr
rm(avgCorr)
gc()

A<- pmax(A.pos,A.neg)
C1[A==0]<- 0
a<- rowSums(A)
rm(A.pos)
rm(A.neg)
rm(A)
gc()

#in case the correlation network needs to be generated as output (tab delimited
text file)
#write.table(C1, paste(getwd(), "/tsCorr.txt", sep=""), sep="\t", row.names = T,
col.names = T, quote=F)
return(C1)
}

#####

```

## Tables

Table S1: Results from the robustness analysis using the minimum %age individuals having the same correlation direction (for  $|corr.| \geq 0.6$ ).

| <b>%age minimum individuals</b> |                 | <b>LCD</b> | <b>VLCD</b> |
|---------------------------------|-----------------|------------|-------------|
| 25                              | Total edges     | 127        | 127         |
|                                 | %age            | 100.00     | 100.00      |
| 30                              | Conserved edges | 127        | 126         |
|                                 | %age            | 100.00     | 99.21       |
| 35                              | Conserved edges | 127        | 126         |
|                                 | %age            | 100.00     | 99.21       |
| 40                              | Conserved edges | 125        | 126         |
|                                 | %age            | 98.43      | 99.21       |
| 45                              | Conserved edges | 119        | 125         |
|                                 | %age            | 93.70      | 98.43       |
| 50                              | Conserved edges | 108        | 120         |
|                                 | %age            | 85.04      | 94.49       |

Table S2: Results from the leave-n-out cross-validation analysis for n= 1 and 2 (max 10% of total samples) in the overlap network. The analysis here represents loss of sensitivity. The correlation criteria is  $|\text{corr.}| \geq 0.6$  in at least 25% of the individuals having the same direction of the correlation.

| Leave-n-out, n= | # of combinations in each diet | Criteria:<br>$ \text{corr.}  \geq 0.6$ and<br>min. 25% ind.s | LCD    | VLCD   |
|-----------------|--------------------------------|--------------------------------------------------------------|--------|--------|
| 0               | 1                              | Total edges                                                  | 127    | 127    |
|                 |                                | %age                                                         | 100.00 | 100.00 |
| 1               | 22                             | Conserved edges                                              | 85     | 117    |
|                 |                                | %age                                                         | 66.93  | 92.13  |
| 2               | 231                            | Conserved edges                                              | 52     | 104    |
|                 |                                | %age                                                         | 40.94  | 81.89  |

Table S3: Results from the leave-n-out cross-validation analysis for n= 1 and 2 (max 10% of total samples) in the correlation networks of the respective diets. The analysis here represents loss of specificity. The correlation criteria is  $|\text{corr.}| \geq 0.6$  in at least 25% of the individuals having the same direction of the correlation.

| Leave-n-out, n= | # of combinations in each diet | Criteria:<br>$ \text{corr.}  \geq 0.6$ and<br>min. 25% ind.s | LCD | VLCD |
|-----------------|--------------------------------|--------------------------------------------------------------|-----|------|
| 0               | 1                              | Total edges                                                  | 149 | 1125 |
| 1               | 22                             | New edges (avg. of all combinations)                         | 20  | 54   |
| 2               | 231                            | New edges (avg. of all combinations)                         | ~36 | ~82  |

Table S4: Results from the ConsensusPathDB analysis on the overlap network. BioCarta leptin pathway discussed in the discussion section of the article is highlighted in red.

| pathway                                                | p-value     | q-value    | source       | members_in put_overlap                                  | members_in put_overlap_geneids | size | effective_size |
|--------------------------------------------------------|-------------|------------|--------------|---------------------------------------------------------|--------------------------------|------|----------------|
| Omega-3 fatty acid metabolism                          | 4.84E-05    | 0.00781987 | EHMN         | ENSG00000221968;<br>ENSG00000134824;<br>ENSG00000149485 | 3995; 3992;<br>9415            | 16   | 16             |
| Fatty Acid Biosynthesis                                | 0.000130585 | 0.00781987 | Wikipathways | ENSG00000099194;<br>ENSG00000093144;<br>ENSG00000278540 | 55862; 31;<br>6319             | 22   | 22             |
| Biosynthesis of unsaturated fatty acids - Homo sapiens | 0.000149689 | 0.00781987 | KEGG         | ENSG00000099194;<br>ENSG00000134824;                    | 3992; 6319;<br>9415            | 23   | 23             |



|                                                   |             |             |              |                                                                                                                                                                     |                                                   |     |     |
|---------------------------------------------------|-------------|-------------|--------------|---------------------------------------------------------------------------------------------------------------------------------------------------------------------|---------------------------------------------------|-----|-----|
| (human)                                           |             |             |              | ENSG000001<br>49485                                                                                                                                                 |                                                   |     |     |
| AMPK signaling pathway - Homo sapiens (human)     | 0.000235714 | 0.00781987  | KEGG         | ENSG000001<br>04812;<br>ENSG0000000<br>99194;<br>ENSG000001<br>74697;<br>ENSG000001<br>10092;<br>ENSG000002<br>78540                                                | 6319; 31;<br>595; 3952;<br>2997                   | 124 | 123 |
| Omega-6 fatty acid metabolism                     | 0.000272466 | 0.00781987  | EHMN         | ENSG000002<br>21968;<br>ENSG000001<br>34824;<br>ENSG000001<br>49485                                                                                                 | 3992; 3995;<br>9415                               | 28  | 28  |
| Keratan sulfate biosynthesis                      | 0.000272466 | 0.00781987  | Reactome     | ENSG000001<br>39329;<br>ENSG000001<br>06809;<br>ENSG000001<br>22176                                                                                                 | 4060; 4969;<br>2331                               | 28  | 28  |
| Alpha Linolenic Acid and Linoleic Acid Metabolism | 0.000304106 | 0.00781987  | SMPDB        | ENSG000001<br>34824;<br>ENSG000001<br>49485                                                                                                                         | 9415; 3992                                        | 6   | 6   |
| Terminal pathway of complement                    | 0.000424502 | 0.008930523 | Reactome     | ENSG000001<br>12936;<br>ENSG000000<br>39537                                                                                                                         | 730; 729                                          | 7   | 7   |
| Keratan sulfate/keratin metabolism                | 0.000446526 | 0.008930523 | Reactome     | ENSG000001<br>39329;<br>ENSG000001<br>06809;<br>ENSG000001<br>22176                                                                                                 | 4060; 4969;<br>2331                               | 33  | 33  |
| Nuclear Receptors Meta-Pathway                    | 0.000514786 | 0.009234772 | Wikipathways | ENSG000000<br>65833;<br>ENSG000000<br>99194;<br>ENSG000001<br>98848;<br>ENSG000001<br>10092;<br>ENSG000000<br>04799;<br>ENSG000001<br>12186;<br>ENSG000001<br>81019 | 4199; 595;<br>1066; 6319;<br>1728; 10486;<br>5166 | 314 | 313 |
| Linoleic acid (LA) metabolism                     | 0.000564347 | 0.009234772 | Reactome     | ENSG000001<br>34824;<br>ENSG000001<br>49485                                                                                                                         | 3992; 9415                                        | 8   | 8   |
| reversal of insulin resistance by leptin          | 0.000723467 | 0.010852004 | BioCarta     | ENSG000001<br>74697;<br>ENSG000002<br>78540                                                                                                                         | 3952; 31                                          | 9   | 9   |
| alternative                                       | 0.000901689 | 0.012484929 | BioCarta     | ENSG000001                                                                                                                                                          | 730; 729                                          | 10  | 10  |

|                                                                |             |             |              |                                                                                                                                             |                                          |     |     |
|----------------------------------------------------------------|-------------|-------------|--------------|---------------------------------------------------------------------------------------------------------------------------------------------|------------------------------------------|-----|-----|
| complement pathway                                             |             |             |              | 12936;<br>ENSG000000<br>39537                                                                                                               |                                          |     |     |
| Extracellular matrix organization                              | 0.001202898 | 0.015465837 | Reactome     | ENSG000001<br>35424;<br>ENSG000001<br>43387;<br>ENSG000001<br>34013;<br>ENSG000001<br>39329;<br>ENSG000000<br>87245;<br>ENSG000001<br>22176 | 4017; 3679;<br>2331; 4060;<br>4313; 1513 | 264 | 263 |
| lectin induced complement pathway                              | 0.001314758 | 0.01549266  | BioCarta     | ENSG000001<br>12936;<br>ENSG000000<br>39537                                                                                                 | 730; 729                                 | 12  | 12  |
| alpha-linolenic acid (ALA) metabolism                          | 0.001549266 | 0.01549266  | Reactome     | ENSG000001<br>34824;<br>ENSG000001<br>49485                                                                                                 | 3992; 9415                               | 13  | 13  |
| alpha-linolenic (omega3) and linoleic (omega6) acid metabolism | 0.001549266 | 0.01549266  | Reactome     | ENSG000001<br>34824;<br>ENSG000001<br>49485                                                                                                 | 3992; 9415                               | 13  | 13  |
| icosapentaenoate biosynthesis II (metazoa)                     | 0.001549266 | 0.01549266  | HumanCyc     | ENSG000001<br>34824;<br>ENSG000001<br>49485                                                                                                 | 3992; 9415                               | 13  | 13  |
| classical complement pathway                                   | 0.001802198 | 0.017073456 | BioCarta     | ENSG000001<br>12936;<br>ENSG000000<br>39537                                                                                                 | 730; 729                                 | 14  | 14  |
| ECM proteoglycans                                              | 0.002000476 | 0.018004287 | Reactome     | ENSG000001<br>39329;<br>ENSG000001<br>35424;<br>ENSG000001<br>22176                                                                         | 4060; 3679;<br>2331                      | 56  | 55  |
| Complement Activation, Classical Pathway                       | 0.00266988  | 0.022884683 | Wikipathways | ENSG000001<br>12936;<br>ENSG000000<br>39537                                                                                                 | 730; 729                                 | 17  | 17  |
| AMPK Signaling                                                 | 0.003665435 | 0.026814921 | Wikipathways | ENSG000001<br>04812;<br>ENSG000001<br>74697;<br>ENSG000002<br>78540                                                                         | 3952; 31;<br>2997                        | 68  | 68  |
| PPAR signaling pathway - Homo sapiens (human)                  | 0.003819792 | 0.026814921 | KEGG         | ENSG000000<br>65833;<br>ENSG000000<br>99194;<br>ENSG000001<br>34824                                                                         | 6319; 9415;<br>4199                      | 69  | 69  |
| Linoleate metabolism                                           | 0.004306497 | 0.026814921 | EHMN         | ENSG000002<br>21968;                                                                                                                        | 9415; 3992;<br>3995                      | 72  | 72  |

|                                                                                     |             |             |              |                                                                                                                                                                                                                                                                                                                                    |                                                                                                     |      |      |
|-------------------------------------------------------------------------------------|-------------|-------------|--------------|------------------------------------------------------------------------------------------------------------------------------------------------------------------------------------------------------------------------------------------------------------------------------------------------------------------------------------|-----------------------------------------------------------------------------------------------------|------|------|
|                                                                                     |             |             |              | ENSG000001<br>34824;<br>ENSG000001<br>49485                                                                                                                                                                                                                                                                                        |                                                                                                     |      |      |
| Pyruvate<br>Dehydrogenase<br>Complex<br>Deficiency                                  | 0.004469153 | 0.026814921 | SMPDB        | ENSG000000<br>65833;<br>ENSG000002<br>78540                                                                                                                                                                                                                                                                                        | 4199; 31                                                                                            | 22   | 22   |
| Primary<br>hyperoxaluria<br>II, PH2                                                 | 0.004469153 | 0.026814921 | SMPDB        | ENSG000000<br>65833;<br>ENSG000002<br>78540                                                                                                                                                                                                                                                                                        | 4199; 31                                                                                            | 22   | 22   |
| Pyruvate<br>kinase<br>deficiency                                                    | 0.004469153 | 0.026814921 | SMPDB        | ENSG000000<br>65833;<br>ENSG000002<br>78540                                                                                                                                                                                                                                                                                        | 4199; 31                                                                                            | 22   | 22   |
| Leigh<br>Syndrome                                                                   | 0.004469153 | 0.026814921 | SMPDB        | ENSG000000<br>65833;<br>ENSG000002<br>78540                                                                                                                                                                                                                                                                                        | 4199; 31                                                                                            | 22   | 22   |
| Pyruvate<br>Metabolism                                                              | 0.004469153 | 0.026814921 | SMPDB        | ENSG000000<br>65833;<br>ENSG000002<br>78540                                                                                                                                                                                                                                                                                        | 4199; 31                                                                                            | 22   | 22   |
| Pyruvate<br>Decarboxylase<br>E1<br>Component<br>Deficiency<br>(PDHE1<br>Deficiency) | 0.004469153 | 0.026814921 | SMPDB        | ENSG000000<br>65833;<br>ENSG000002<br>78540                                                                                                                                                                                                                                                                                        | 4199; 31                                                                                            | 22   | 22   |
| Leptin<br>signaling<br>pathway                                                      | 0.005011674 | 0.028826678 | Wikipathways | ENSG000001<br>74697;<br>ENSG000001<br>10092;<br>ENSG000002<br>78540                                                                                                                                                                                                                                                                | 595; 3952; 31                                                                                       | 76   | 76   |
| Metabolism                                                                          | 0.005124743 | 0.028826678 | Reactome     | ENSG000001<br>51632;<br>ENSG000000<br>62282;<br>ENSG000001<br>06809;<br>ENSG000001<br>16133;<br>ENSG000001<br>96616;<br>ENSG000001<br>49485;<br>ENSG000000<br>04799;<br>ENSG000001<br>34824;<br>ENSG000001<br>39329;<br>ENSG000001<br>04812;<br>ENSG000002<br>78540;<br>ENSG000001<br>22176;<br>ENSG000001<br>86469;<br>ENSG000001 | 1728; 2331;<br>4060; 1718;<br>2997; 31;<br>125; 5166;<br>4969; 1646;<br>54331; 9415;<br>84649; 3992 | 1481 | 1472 |

|                                              |             |             |          |                                     |            |    |    |
|----------------------------------------------|-------------|-------------|----------|-------------------------------------|------------|----|----|
|                                              |             |             |          | 81019                               |            |    |    |
| Regulation of Complement cascade             | 0.005308714 | 0.02895662  | Reactome | ENSG00000112936;<br>ENSG00000039537 | 730; 729   | 24 | 24 |
| Propanoate metabolism - Homo sapiens (human) | 0.007186387 | 0.038045578 | KEGG     | ENSG00000093144;<br>ENSG00000078540 | 55862; 31  | 28 | 28 |
| Activation of Matrix Metalloproteinases      | 0.008222042 | 0.042284788 | Reactome | ENSG00000143387;<br>ENSG00000087245 | 1513; 4313 | 30 | 30 |
| Collagen degradation                         | 0.009893155 | 0.049465773 | Reactome | ENSG00000143387;<br>ENSG00000087245 | 1513; 4313 | 33 | 33 |

Table S5: List of genes in the respective clusters from the overlap network, represented here in HGNC symbols.

| Clusters     | Genes                                                                                                                              |
|--------------|------------------------------------------------------------------------------------------------------------------------------------|
| 1            | ACACA, DHRS11, FADS1, FADS2, OLFM2, PDK4, SCD, SLC29A4                                                                             |
| 2            | CCND1, CTIF, DAB2IP, DGAT2, DTX1, FADS3, ITGA7, PLEKHG5, PMEPA1, RBPMS2, SYNPO, TENM4, TLCD2, TMEM120B, TMEM184B, TNFRSF25, ZNF219 |
| 3            | ABCC6, ADH1B, C6, C7, CAP2, ECHDC1, FAT1, GNG2, HSPA12A, KLB, KLHL31, MAL2, ME1, MRAP                                              |
| 4            | GPLD1, KANK4, KIF1C, LEP, NPR3, NQO1, PDZD2, SLC24A3, SNCG, SRPX, VGLL3, VLDLR, VLDLR-AS1                                          |
| 5            | AKRIC2, DHCR24, FSTL3, LOXL2, TUBB2A                                                                                               |
| Un-clustered | AACS, CTSK, FFAR4, FMOD, GPNMB, GYS1, LUM, MMP2, OGN, SLC7A7                                                                       |
